# Supplementary material for: Parenting Practices May Buffer the Impact of Adversity on Epigenetic Age Acceleration Among Young Children With Developmental Delays
Source: PubMed Central journal article supplement — Psychol Sci. 2023 Sep 21;34(10):1173–85. doi: 10.1177/09567976231194221 (PMC10626625; doi:10.1177/09567976231194221), 2023-09-21
Supplement: sj-pdf-1-pss-10.1177_09567976231194221.pdf [file sj-pdf-1-pss-10.1177_09567976231194221.pdf]

Positive Parenting

Negative Parenting

# Supplement: Primary Models

## Positive Parenting

```
library(lavaan)

PosFig<- '
#regressions
EAAfollowup ~ b1*cr
EAAfollowup ~ b2*mc_postdo
EAAfollowup ~ b3*postdoxcr
EAAfollowup ~ ncgender
EAAfollowup ~ bldo
cr~bldo
cr~postdoxcr

#constraints for simple slopes
Low:=b1+b3*-0.1459278
Avg:= b1
High:=b1+b3*0.1459278
'

PosFig.fit<-sem(PosFig, data = data, fixed.x=FALSE, missing = "fiml", estimator = "MLR")

summary(PosFig.fit, standardized = TRUE, fit.measures=TRUE, ci=TRUE)
```

```

## lavaan 0.6.15 ended normally after 107 iterations
##
## Estimator ML
## Optimization method NLMINB
## Number of model parameters 25
##
## Number of observations 62
## Number of missing patterns 3
##
## Model Test User Model:
## Standard Scaled
## Test Statistic 0.359 0.421
## Degrees of freedom 2 2
## P-value (Chi-square) 0.836 0.810
## Scaling correction factor 0.852
## Yuan-Bentler correction (Mplus variant)
##
## Model Test Baseline Model:
##
## Test statistic 12.365 11.807
## Degrees of freedom 9 9
## P-value 0.193 0.224
## Scaling correction factor 1.047
##
## User Model versus Baseline Model:
##
## Comparative Fit Index (CFI) 1.000 1.000
## Tucker-Lewis Index (TLI) 3.194 3.531
##
## Robust Comparative Fit Index (CFI) 1.000
## Robust Tucker-Lewis Index (TLI) 4.270
##
## Loglikelihood and Information Criteria:
##
## Loglikelihood user model (H0) -61.138 -61.138
## Scaling correction factor 1.248
## for the MLR correction
## Loglikelihood unrestricted model (H1) -60.958 -60.958
## Scaling correction factor 1.219
## for the MLR correction
##
## Akaike (AIC) 172.275 172.275
## Bayesian (BIC) 225.453 225.453
## Sample-size adjusted Bayesian (SABIC) 146.796 146.796
##
## Root Mean Square Error of Approximation:
##
## RMSEA 0.000 0.000
## 90 Percent confidence interval - lower 0.000 0.000
## 90 Percent confidence interval - upper 0.145 0.177
## P-value H_0: RMSEA <= 0.050 0.857 0.800
## P-value H_0: RMSEA >= 0.080 0.114 0.166

```

```

##
## Robust RMSEA 0.000
## 90 Percent confidence interval - lower 0.000
## 90 Percent confidence interval - upper 0.145
## P-value H_0: Robust RMSEA <= 0.050 0.837
## P-value H_0: Robust RMSEA >= 0.080 0.127
##
## Standardized Root Mean Square Residual:
##
## SRMR 0.013 0.013
##
## Parameter Estimates:
##
## Standard errors Sandwich
## Information bread Observed
## Observed information based on Hessian
##
## Regressions:
## Estimate Std.Err z-value P(>|z|) ci.lower ci.upper
## EAAfollowup ~
## cr (b1) -0.049 0.042 -1.152 0.249 -0.132 0.034
## mc_postdo (b2) 0.269 0.415 0.648 0.517 -0.544 1.082
## postdoxcr (b3) -0.676 0.212 -3.193 0.001 -1.092 -0.261
## ncgender 0.325 0.139 2.339 0.019 0.053 0.597
## bldo 0.516 0.638 0.809 0.418 -0.734 1.766
## cr ~
## bldo -1.848 1.247 -1.482 0.138 -4.292 0.596
## postdoxcr 0.193 1.571 0.123 0.902 -2.887 3.273
## Std.lv Std.all
##
## -0.049 -0.117
## 0.269 0.078
## -0.676 -0.219
## 0.325 0.294
## 0.516 0.098
##
## -1.848 -0.148
## 0.193 0.026
##
## Covariances:
## Estimate Std.Err z-value P(>|z|) ci.lower ci.upper
## mc_postdo ~~
## postdoxcr 0.004 0.006 0.744 0.457 -0.007 0.016
## ncgender -0.011 0.007 -1.634 0.102 -0.024 0.002
## bldo 0.004 0.002 2.004 0.045 0.000 0.008
## postdoxcr ~~
## ncgender -0.000 0.008 -0.059 0.953 -0.017 0.016
## bldo -0.000 0.002 -0.183 0.855 -0.004 0.004
## ncgender ~~
## bldo 0.000 0.005 0.015 0.988 -0.010 0.010
## Std.lv Std.all
##

```

```

##      0.004      0.184
##     -0.011     -0.163
##      0.004      0.303
##
##     -0.000     -0.007
##     -0.000     -0.024
##
##      0.000      0.002
##
## Intercepts:
##              Estimate Std.Err  z-value  P(>|z|)  ci.lower  ci.upper
## .EAAfollowup    -0.036   0.173   -0.206   0.837   -0.374   0.303
## .cr              2.633   0.231   11.416   0.000    2.181   3.085
## mc_postdo        0.003   0.019    0.139   0.889   -0.035   0.040
## postdoxcr        0.005   0.022    0.215   0.830   -0.038   0.047
## ncgender         0.290   0.058    5.036   0.000    0.177   0.403
## bldo             0.134   0.012   11.024   0.000    0.110   0.158
## Std.lv  Std.all
## -0.036  -0.071
##  2.633   2.201
##  0.003   0.018
##  0.005   0.029
##  0.290   0.640
##  0.134   1.398
##
## Variances:
##              Estimate Std.Err  z-value  P(>|z|)  ci.lower  ci.upper
## .EAAfollowup    0.211   0.045   4.731   0.000    0.123   0.298
## .cr              1.398   0.218   6.418   0.000    0.971   1.825
## mc_postdo        0.021   0.007   3.199   0.001    0.008   0.034
## postdoxcr        0.026   0.010   2.532   0.011    0.006   0.047
## ncgender         0.206   0.024   8.523   0.000    0.159   0.253
## bldo             0.009   0.002   4.425   0.000    0.005   0.013
## Std.lv  Std.all
##  0.211   0.838
##  1.398   0.977
##  0.021   1.000
##  0.026   1.000
##  0.206   1.000
##  0.009   1.000
##
## Defined Parameters:
##              Estimate Std.Err  z-value  P(>|z|)  ci.lower  ci.upper
## Low           0.050   0.059    0.851   0.395   -0.065   0.165
## Avg          -0.049   0.042   -1.152   0.249   -0.132   0.034
## High         -0.148   0.046   -3.231   0.001   -0.237  -0.058
## Std.lv  Std.all
##  0.050  -0.085
## -0.049  -0.117
## -0.148  -0.149

```

# Negative Parenting

```
library(lavaan)

NegFig<- '
#regressions
EAAfollowup ~ b1*cr
EAAfollowup ~ b2*mc_postdont
EAAfollowup ~ b3*postdontxcr
EAAfollowup ~ ncgender
EAAfollowup ~ bldont
cr~bldont
cr~postdontxcr

#constraints for simple slopes
Low:=b1+b3*-0.1850237
Avg:= b1
High:=b1+b3*0.1850237
'

NegFig.fit<-sem(NegFig, data = data, fixed.x=FALSE, missing = "fiml", estimator = "MLR")

summary(NegFig.fit, standardized = TRUE, fit.measures=TRUE, ci = TRUE)
```

```

## lavaan 0.6.15 ended normally after 90 iterations
##
## Estimator ML
## Optimization method NLMINB
## Number of model parameters 25
##
## Number of observations 62
## Number of missing patterns 3
##
## Model Test User Model:
## Standard Scaled
## Test Statistic 0.622 0.604
## Degrees of freedom 2 2
## P-value (Chi-square) 0.733 0.739
## Scaling correction factor 1.029
## Yuan-Bentler correction (Mplus variant)
##
## Model Test Baseline Model:
##
## Test statistic 16.188 14.436
## Degrees of freedom 9 9
## P-value 0.063 0.108
## Scaling correction factor 1.121
##
## User Model versus Baseline Model:
##
## Comparative Fit Index (CFI) 1.000 1.000
## Tucker-Lewis Index (TLI) 1.863 2.155
##
## Robust Comparative Fit Index (CFI) 1.000
## Robust Tucker-Lewis Index (TLI) 2.439
##
## Loglikelihood and Information Criteria:
##
## Loglikelihood user model (H0) -125.748 -125.748
## Scaling correction factor 1.039
## for the MLR correction
## Loglikelihood unrestricted model (H1) -125.437 -125.437
## Scaling correction factor 1.038
## for the MLR correction
##
## Akaike (AIC) 301.496 301.496
## Bayesian (BIC) 354.674 354.674
## Sample-size adjusted Bayesian (SABIC) 276.017 276.017
##
## Root Mean Square Error of Approximation:
##
## RMSEA 0.000 0.000
## 90 Percent confidence interval - lower 0.000 0.000
## 90 Percent confidence interval - upper 0.177 0.172
## P-value H_0: RMSEA <= 0.050 0.766 0.778
## P-value H_0: RMSEA >= 0.080 0.190 0.179

```

```

##
## Robust RMSEA 0.000
## 90 Percent confidence interval - lower 0.000
## 90 Percent confidence interval - upper 0.179
## P-value H_0: Robust RMSEA <= 0.050 0.771
## P-value H_0: Robust RMSEA >= 0.080 0.187
##
## Standardized Root Mean Square Residual:
##
## SRMR 0.019 0.019
##
## Parameter Estimates:
##
## Standard errors Sandwich
## Information bread Observed
## Observed information based on Hessian
##
## Regressions:
## Estimate Std.Err z-value P(>|z|) ci.lower ci.upper
## EAAfollowup ~
## cr (b1) -0.033 0.039 -0.848 0.397 -0.109 0.043
## mc_pstdnt (b2) -0.147 0.268 -0.546 0.585 -0.672 0.379
## pstdntxcr (b3) 0.472 0.186 2.542 0.011 0.108 0.835
## ncgender 0.270 0.146 1.856 0.063 -0.015 0.556
## bldont -0.076 0.428 -0.178 0.859 -0.915 0.763
## cr ~
## bldont 1.652 1.010 1.636 0.102 -0.327 3.631
## pstdntxcr -1.478 1.015 -1.455 0.146 -3.468 0.512
## Std.lv Std.all
##
## -0.033 -0.079
## -0.147 -0.054
## 0.472 0.217
## 0.270 0.245
## -0.076 -0.024
##
## 1.652 0.216
## -1.478 -0.286
##
## Covariances:
## Estimate Std.Err z-value P(>|z|) ci.lower ci.upper
## mc_postdont ~~
## postdontxcr 0.004 0.008 0.563 0.573 -0.011 0.019
## ncgender -0.002 0.010 -0.172 0.864 -0.021 0.018
## bldont 0.006 0.004 1.527 0.127 -0.002 0.013
## postdontxcr ~~
## ncgender 0.017 0.013 1.326 0.185 -0.008 0.042
## bldont 0.007 0.004 1.589 0.112 -0.002 0.015
## ncgender ~~
## bldont -0.004 0.008 -0.480 0.631 -0.020 0.012
## Std.lv Std.all
##

```

```

##      0.004      0.102
##     -0.002     -0.021
##      0.006      0.202
##
##      0.017      0.160
##      0.007      0.189
##
##     -0.004     -0.056
##
## Intercepts:
##           Estimate Std.Err  z-value  P(>|z|)  ci.lower  ci.upper
## .EAAfollowup      0.051   0.241   0.210   0.833   -0.421   0.522
## .cr                1.534   0.591   2.595   0.009    0.375   2.692
## mc_postdont       -0.001   0.024  -0.023   0.981   -0.047   0.046
## postdontxcr       -0.006   0.030  -0.211   0.833   -0.066   0.053
## ncgender          0.290   0.058   5.036   0.000    0.177   0.403
## bldont            0.511   0.020  25.457   0.000    0.471   0.550
## Std.lv  Std.all
## 0.051   0.101
## 1.534   1.282
## -0.001  -0.003
## -0.006  -0.028
## 0.290   0.640
## 0.511   3.267
##
## Variances:
##           Estimate Std.Err  z-value  P(>|z|)  ci.lower  ci.upper
## .EAAfollowup      0.216   0.045   4.819   0.000    0.128   0.303
## .cr                1.281   0.241   5.314   0.000    0.808   1.753
## mc_postdont        0.034   0.005   6.627   0.000    0.024   0.044
## postdontxcr        0.053   0.015   3.475   0.001    0.023   0.084
## ncgender           0.206   0.024   8.523   0.000    0.159   0.253
## bldont             0.024   0.004   6.010   0.000    0.016   0.032
## Std.lv  Std.all
## 0.216   0.858
## 1.281   0.895
## 0.034   1.000
## 0.053   1.000
## 0.206   1.000
## 0.024   1.000
##
## Defined Parameters:
##           Estimate Std.Err  z-value  P(>|z|)  ci.lower  ci.upper
## Low        -0.120   0.043  -2.803   0.005   -0.204  -0.036
## Avg        -0.033   0.039  -0.848   0.397   -0.109   0.043
## High        0.054   0.060   0.912   0.362   -0.062   0.171
## Std.lv  Std.all
## -0.120  -0.119
## -0.033  -0.079
## 0.054   -0.038

```
